# Supplementary material
Source: publisher figshare collection journal article supplement (https://karger.figshare.com/ndownloader/files/17512904)
Supplement: Supplementary file 1 [file 17512904]

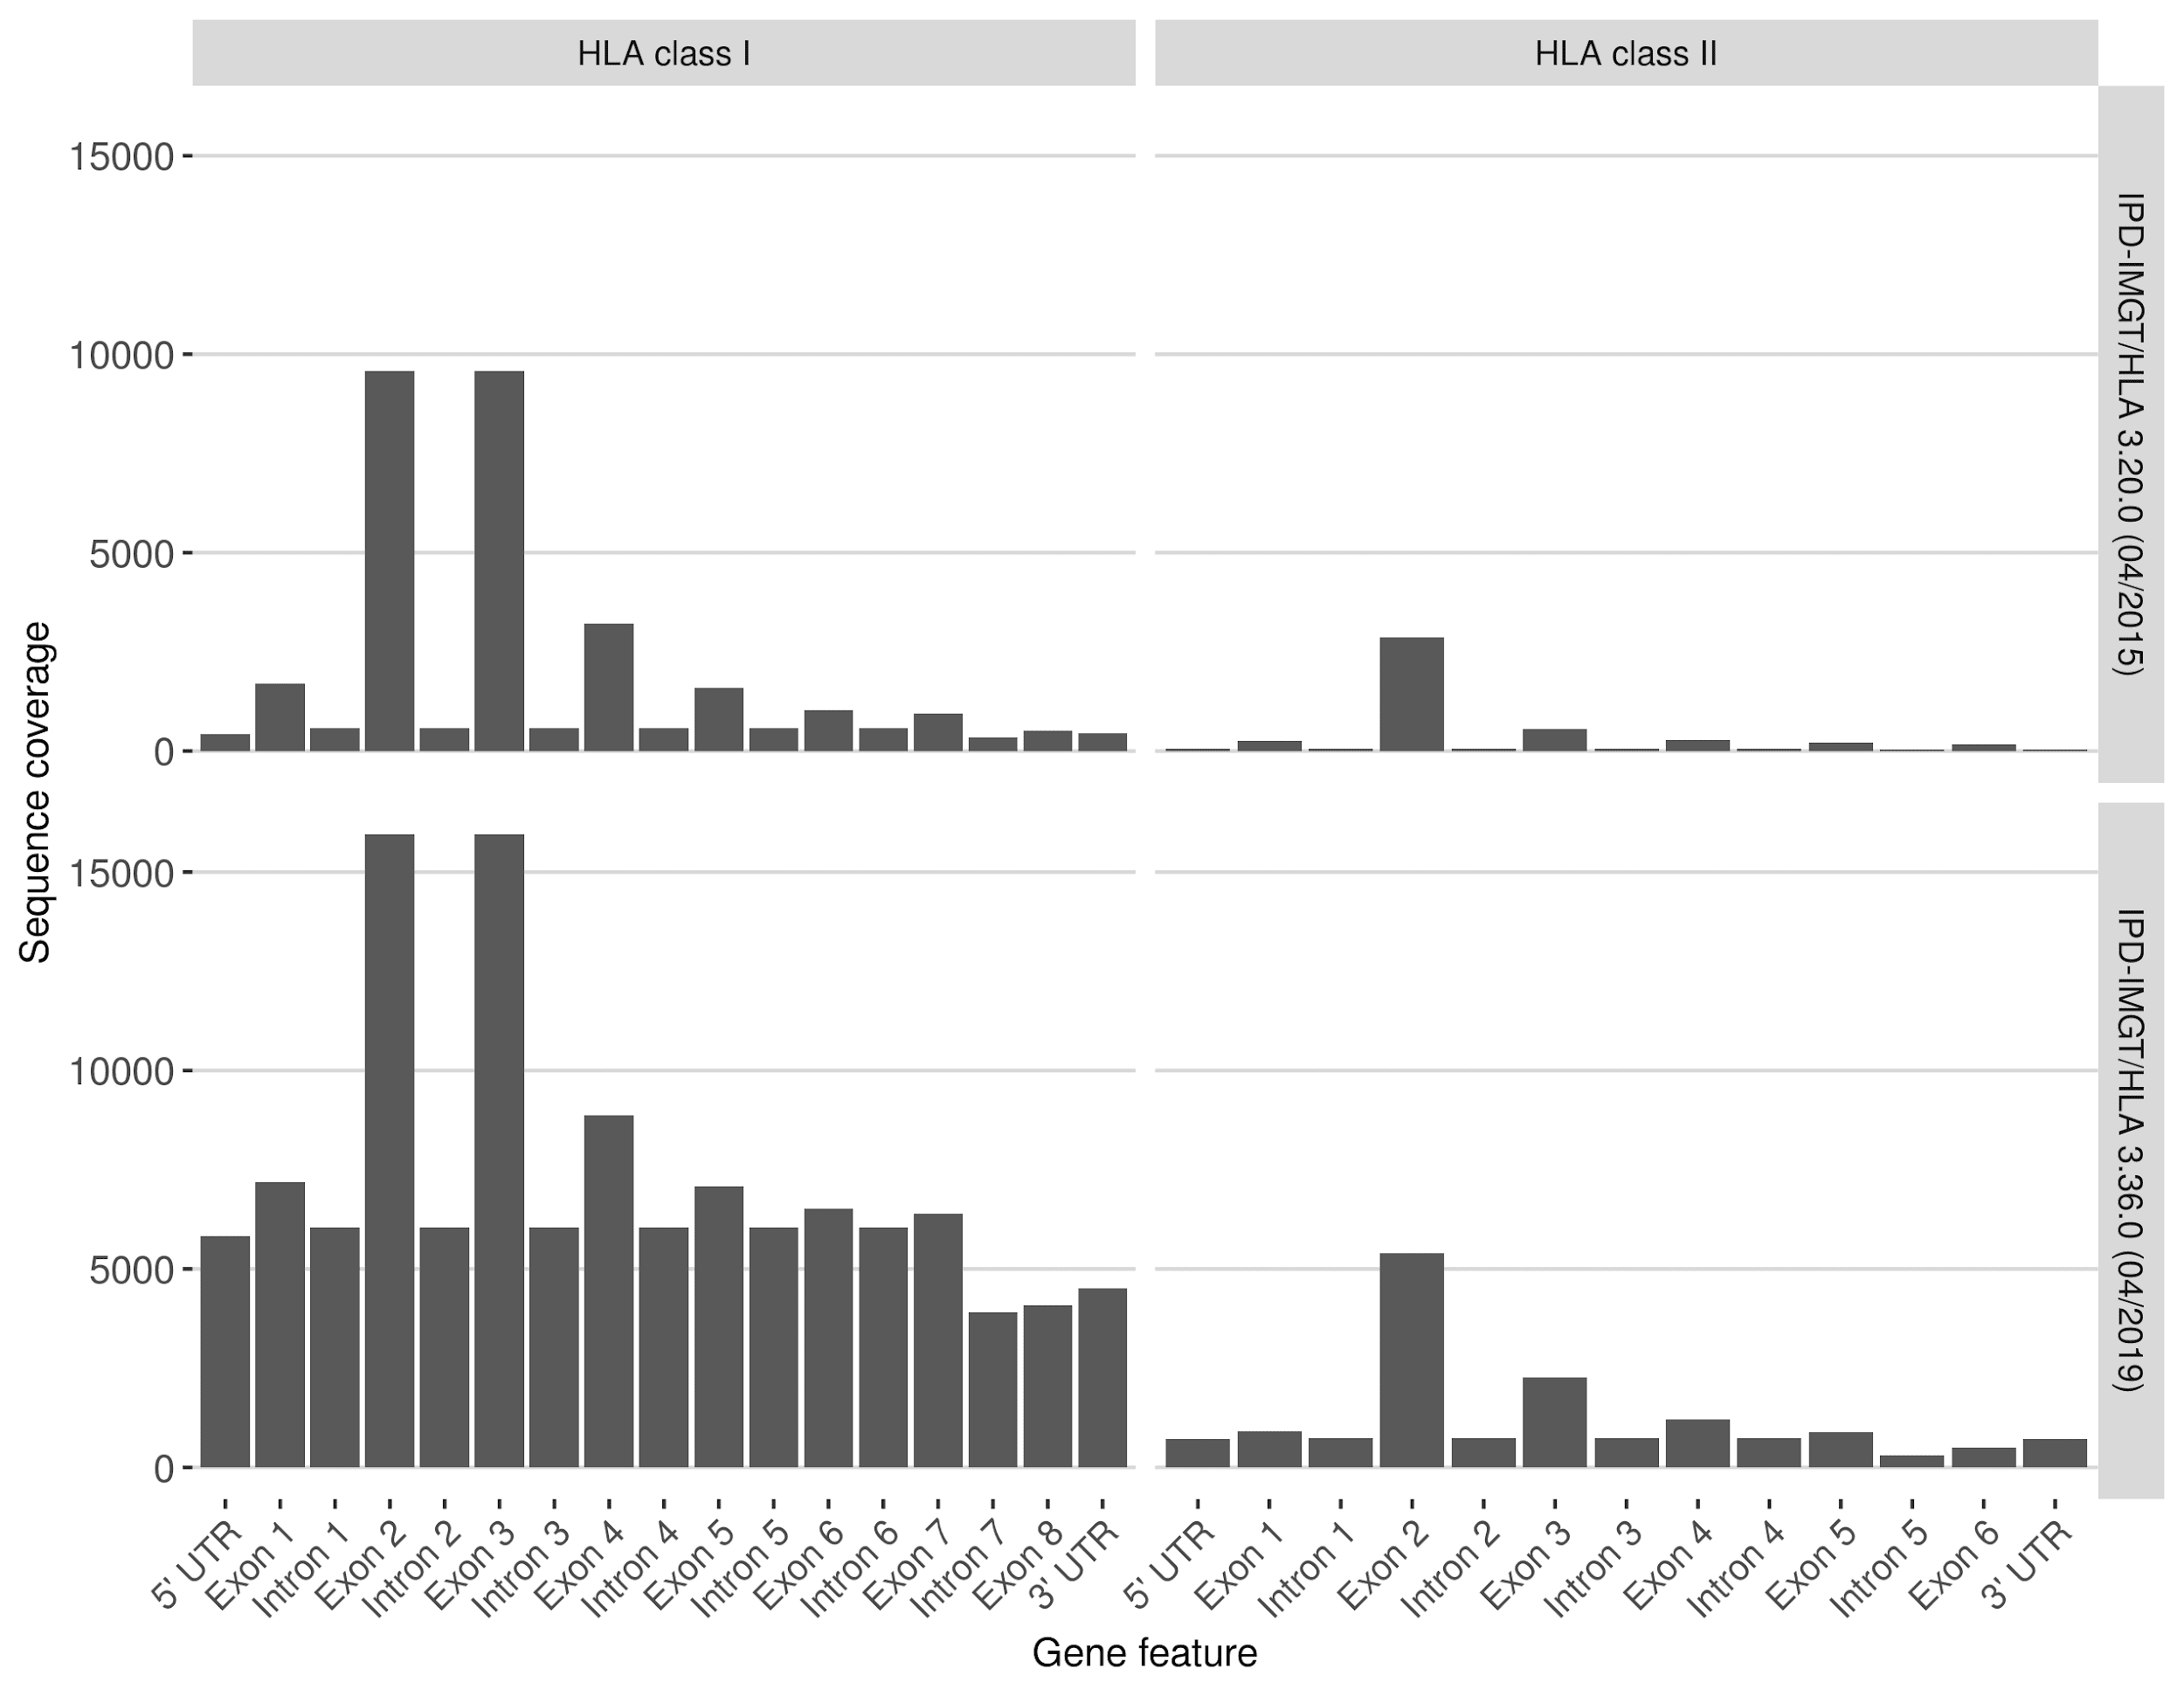


**Supplementary Figure 1.** Varying sequence coverage of different gene features of class I (HLA-A, -B, -C) and class II (HLA-DRB1, -DQB1, -DPB1) HLA genes in the IPD-IMGT/HLA releases 3.20.0 (2015) and 3.36.0 (2019). Exons 2 and 3 in class I genes and exon 2 in class 2 genes are mandatory for submission to IPD-IMGT/HA.

**Supplementary Table 1:** An overview over currently available HLA genotyping software.

| Tool | Resolution | Licence | Input Data | Source |
| --- | --- | --- | --- | --- |
| ALPHLARD(-NT) [[35]](https://paperpile.com/c/sqiuyU/igFp) | Class I + II; 3-field | Not available | WGS, WES | Not available |
| ATHLATES [[72]](https://paperpile.com/c/sqiuyU/PrBq) | Class I + II; 3-field | Academic non-commercial use only | WES | https://www.broadinstitute.org/viral-genomics/athlates |
| GenDx NGSengine | Class I + II; 4-field | Commercial | targeted data | https://www.gendx.com/products/ngsengine |
| HLA*PRG:LA [[80,83]](https://paperpile.com/c/sqiuyU/WFip+r9cT) | Class I + II; 3-field | Open source | WGS, WES, targeted data | https://github.com/DiltheyLab/HLA-LA |
| HLA-HD [[99]](https://paperpile.com/c/sqiuyU/JBVe) | Class I + II; up to 3-field | Academic non-commercial use only | WES | https://www.genome.med.kyoto-u.ac.jp/HLA-HD/ |
| HLA-Vbseq [[71]](https://paperpile.com/c/sqiuyU/ploG) | Class I + II; 2-field | Academic non-commercial use only | WGS | http://nagasakilab.csml.org/hla/ |
| HLAssign [100[]](https://paperpile.com/c/sqiuyU/rz72) | Class I + II; 3-field | Open source | Targeted HLA enrichment /wo PCR | https://www.ikmb.uni-kiel.de/resources/download-tools/software/hlassign |
| HLAforest [[69]](https://paperpile.com/c/sqiuyU/sjsw) | Class I + II; 2-field | Academic non-commercial use only | RNA-seq | https://github.com/FNaveed786/hlaforest |
| HLAminer [[101]](https://paperpile.com/c/sqiuyU/cIEO) | Class I;  up to 2-field | Academic non-commercial use only | RNA-seq, WGS, WES | https://github.com/warrenlr/HLAminer |
| HLAProfiler [[102]](https://paperpile.com/c/sqiuyU/NbTn) | Class I + II; 2-field | Academic non-commercial use only | RNA-seq | https://github.com/ExpressionAnalysis/HLAProfiler |
| HLAreporter [[85]](https://paperpile.com/c/sqiuyU/AjoB) | Class I + II; 2-field | Open source | WES | http://paed.hku.hk/genome/software.html |
| HLAscan [[36]](https://paperpile.com/c/sqiuyU/cK30) | Class I + II;  2-field | Open source | WGS, WES, targeted data | http://www.genomekorea.com/display/tools/HLA_SCAN |
| Kourami[[86]](https://paperpile.com/c/sqiuyU/HPxW) | Class I + II; 3-field | Open source | WGS | https://github.com/Kingsford-Group/kourami |
| neXtype [[7]](https://paperpile.com/c/sqiuyU/32wv) | Class I + II;  up to 3-field | In-house only | Exon amplicons | Not available |
| Omixon HLA Twin | Class I + II; 4-field | Commercial | targeted data | https://www.omixon.com/products/hla-twin/ |
| OptiType [[79,82]](https://paperpile.com/c/sqiuyU/JQAR+gIak) | Class I + II; 2-field | Open source | WGS,WES, RNA-seq | https://github.com/FRED-2/OptiType |
| PHLAT [[70,103]](https://paperpile.com/c/sqiuyU/Uv7K+JirI) | Class I + II; 2-field | Academic non-commercial use only | WES, RNA-seq | https://sites.google.com/site/phlatfortype/ |
| Polysolver [[104]](https://paperpile.com/c/sqiuyU/7WJq) | Class I + II;  2-field | Academic non-commercial use only | WES | https://software.broadinstitute.org/cancer/cga/polysolver |
| seq2HLA [[68]](https://paperpile.com/c/sqiuyU/W1dU) | Class I + II;  1-field | Open source | RNA-seq | https://bitbucket.org/sebastian_boegel/seq2hla |
| xHLA [[41]](https://paperpile.com/c/sqiuyU/mcsJ) | Class I + II;  2-field | Academic non-commercial use only | WGS, WES | https://github.com/humanlongevity/HLA |

**Additional References**

99 Kawaguchi S, Higasa K, Shimizu M, Yamada R, Matsuda F. HLA-HD: an accurate HLA typing algorithm for next-generation sequencing data. **Hum Mutat.** 2017 Jul;38(7):788–97.

100 Wittig M, Anmarkrud JA, Kässens JC, Koch S, Forster M, Ellinghaus E, et al. Development of a high-resolution NGS-based HLA-typing and analysis pipeline. **Nucleic Acids Res.** 2015 Jun;43(11):e70–70.

101 Warren RL, Choe G, Freeman DJ, Castellarin M, Munro S, Moore R, et al. Derivation of HLA types from shotgun sequence datasets. **Genome Med.** 2012 Dec;4(12):95.

102 Buchkovich ML, Brown CC, Robasky K, Chai S, Westfall S, Vincent BG, et al. HLAProfiler utilizes k-mer profiles to improve HLA calling accuracy for rare and common alleles in RNA-seq data. **Genome Med.** 2017 Sep;9(1):86.

103 Bai Y, Wang D, Fury W: PHLAT: Inference of High-Resolution HLA Types from RNA and Whole Exome Sequencing. New York: Humana Press; 2018. pp. 193–201.

104 Shukla SA, Rooney MS, Rajasagi M, Tiao G, Dixon PM, Lawrence MS, et al. Comprehensive analysis of cancer-associated somatic mutations in class I HLA genes. **Nat Biotechnol.** 2015 Nov;33(11):1152–8.
